# Supplementary material for: Copy number variation analysis detects novel candidate genes involved in follicular growth and oocyte maturation in a cohort of premature ovarian failure cases
Source: PubMed Central journal article supplement — Hum Reprod. 2016 Aug 4;31(8):1913–25. doi: 10.1093/humrep/dew142 (PMC4974666; doi:10.1093/humrep/dew142), 2016-08-04
Supplement: supp_dew142_dew142supp_table1.pdf [file supp_dew142_dew142supp_table1.pdf]

**Supplementary Table S1** Summary of identified copy number variation regions (CNVRs) in women with spontaneous premature ovarian failure (POF).

| Chr                                                        | Start (hg19) | End (hg19) | Length (bp) | Cases (n = 301) | CNVR frequency in cases |
|------------------------------------------------------------|--------------|------------|-------------|-----------------|-------------------------|
| (A) Microdeletions in cohort of women with spontaneous POF |              |            |             |                 |                         |
| 1                                                          | 49100192     | 50081573   | 981 381     | 1               | 0.003322259             |
| 1                                                          | 62212822     | 62422442   | 209 620     | 1               | 0.003322259             |
| 1                                                          | 102673499    | 102843725  | 170 226     | 1               | 0.003322259             |
| 1                                                          | 114616228    | 114720018  | 103 790     | 1               | 0.003322259             |
| 1                                                          | 196712596    | 196882038  | 169 442     | 3               | 0.009966777             |
| 1                                                          | 240371821    | 240561727  | 189 906     | 1               | 0.003322259             |
| 1                                                          | 242529469    | 242554564  | 25 095      | 1               | 0.003322259             |
| 2                                                          | 35398456     | 35666876   | 268 420     | 1               | 0.003322259             |
| 2                                                          | 35819686     | 36087642   | 267 956     | 1               | 0.003322259             |
| 2                                                          | 73828493     | 73900329   | 71 836      | 1               | 0.003322259             |
| 2                                                          | 124242527    | 124306147  | 63 620      | 1               | 0.003322259             |
| 2                                                          | 179071826    | 179188986  | 117 160     | 1               | 0.003322259             |
| 2                                                          | 242917734    | 243034519  | 116 785     | 7               | 0.023255814             |
| 3                                                          | 26021365     | 26121843   | 100 478     | 1               | 0.003322259             |
| 3                                                          | 60089314     | 60237710   | 148 396     | 1               | 0.003322259             |
| 3                                                          | 75419736     | 75636449   | 216 713     | 1               | 0.003322259             |
| 3                                                          | 85477017     | 85608137   | 131 120     | 1               | 0.003322259             |
| 3                                                          | 113576202    | 113620344  | 44 142      | 1               | 0.003322259             |
| 3                                                          | 151514590    | 151574286  | 59 696      | 2               | 0.006644518             |
| 4                                                          | 69492319     | 69512654   | 20 335      | 1               | 0.003322259             |
| 4                                                          | 177006043    | 177109326  | 103 283     | 1               | 0.003322259             |
| 4                                                          | 188088282    | 188269838  | 181 556     | 1               | 0.003322259             |
| 5                                                          | 68720419     | 68875627   | 155 208     | 1               | 0.003322259             |
| 5                                                          | 84386904     | 84543864   | 156 960     | 1               | 0.003322259             |
| 5                                                          | 96523921     | 96663347   | 139 426     | 1               | 0.003322259             |
| 5                                                          | 97048466     | 97099320   | 50 854      | 5               | 0.016611296             |
| 5                                                          | 113503422    | 113616993  | 113 571     | 1               | 0.003322259             |
| 6                                                          | 73697858     | 73935015   | 237 157     | 1               | 0.003322259             |
| 6                                                          | 78972930     | 79029367   | 56 437      | 4               | 0.013289037             |
| 6                                                          | 79029649     | 79086086   | 56 437      | 2               | 0.006644518             |
| 6                                                          | 162093140    | 162459571  | 366 431     | 1               | 0.003322259             |
| 7                                                          | 2302956      | 2377332    | 74 376      | 1               | 0.003322259             |
| 7                                                          | 33639870     | 33730376   | 90 506      | 1               | 0.003322259             |
| 7                                                          | 64727862     | 64964510   | 236 648     | 1               | 0.003322259             |
| 7                                                          | 76289033     | 76557212   | 268 179     | 1               | 0.003322259             |
| 7                                                          | 109782499    | 109987031  | 204 532     | 1               | 0.003322259             |
| 7                                                          | 110879251    | 111059886  | 180 635     | 1               | 0.003322259             |
| 8                                                          | 8131816      | 12249050   | 4 117 234   | 1               | 0.003322259             |
| 8                                                          | 8325448      | 8444891    | 119 443     | 2               | 0.006644518             |
| 8                                                          | 15939341     | 16021468   | 82 127      | 3               | 0.009966777             |

Continued

**Supplementary Table S1** *Continued*

| Chr | Start (hg19) | End (hg19) | Length (bp) | Cases (n = 301) | CNVR frequency in cases |
|-----|--------------|------------|-------------|-----------------|-------------------------|
| 8   | 113618413    | 113719181  | 100768      | 1               | 0.003322259             |
| 8   | 137688230    | 137857327  | 169097      | 4               | 0.013289037             |
| 9   | 11660139     | 11890045   | 229906      | 2               | 0.006644518             |
| 9   | 19678269     | 19779172   | 100903      | 1               | 0.003322259             |
| 9   | 28195206     | 28336185   | 140979      | 1               | 0.003322259             |
| 9   | 95063947     | 95179836   | 115889      | 1               | 0.003322259             |
| 9   | 104594799    | 104852073  | 257274      | 1               | 0.003322259             |
| 9   | 105765465    | 105815502  | 50037       | 2               | 0.006644518             |
| 9   | 114337013    | 114387135  | 50122       | 1               | 0.003322259             |
| 9   | 119285144    | 119803933  | 518789      | 1               | 0.003322259             |
| 10  | 3148116      | 3202491    | 54375       | 1               | 0.003322259             |
| 10  | 47543322     | 47646751   | 103429      | 2               | 0.006644518             |
| 10  | 68078481     | 68114481   | 36000       | 2               | 0.006644518             |
| 10  | 96499710     | 96557335   | 57625       | 1               | 0.003322259             |
| 10  | 107618048    | 107682005  | 63957       | 1               | 0.003322259             |
| 10  | 135256762    | 135379710  | 122948      | 2               | 0.006644518             |
| 11  | 48518893     | 48942781   | 423888      | 1               | 0.003322259             |
| 11  | 55122337     | 55451045   | 328708      | 4               | 0.013289037             |
| 11  | 56058474     | 56175671   | 117197      | 1               | 0.003322259             |
| 11  | 134365462    | 134439273  | 73811       | 1               | 0.003322259             |
| 12  | 8003758      | 8123306    | 119548      | 1               | 0.003322259             |
| 12  | 63946056     | 64116159   | 170103      | 2               | 0.006644518             |
| 12  | 73243456     | 73363957   | 120501      | 1               | 0.003322259             |
| 13  | 51194405     | 51398466   | 204061      | 1               | 0.003322259             |
| 13  | 97049100     | 97304003   | 254903      | 1               | 0.003322259             |
| 13  | 108157430    | 108269796  | 112366      | 1               | 0.003322259             |
| 14  | 44251087     | 44284324   | 33237       | 1               | 0.003322259             |
| 14  | 46552854     | 46679281   | 126427      | 1               | 0.003322259             |
| 15  | 24357212     | 24472278   | 115066      | 1               | 0.003322259             |
| 15  | 28962131     | 30366247   | 1404116     | 1               | 0.003322259             |
| 15  | 57667027     | 57734290   | 67263       | 1               | 0.003322259             |
| 15  | 83213963     | 84811815   | 1597852     | 1               | 0.003322259             |
| 15  | 101678725    | 101833366  | 154641      | 1               | 0.003322259             |
| 16  | 12688896     | 12730650   | 41754       | 3               | 0.009966777             |
| 16  | 78564441     | 78769788   | 205347      | 1               | 0.003322259             |
| 16  | 81249929     | 81303891   | 53962       | 1               | 0.003322259             |
| 17  | 11885        | 114669     | 102784      | 1               | 0.003322259             |
| 17  | 14105874     | 15383769   | 1277895     | 1               | 0.003322259             |
| 17  | 21539613     | 21874036   | 334423      | 1               | 0.003322259             |
| 18  | 1715758      | 1833682    | 108891      | 2               | 0.006644518             |
| 18  | 1898848      | 1963417    | 64569       | 1               | 0.003322259             |
| 18  | 64086760     | 64334903   | 248143      | 1               | 0.003322259             |
| 18  | 69080787     | 69229915   | 149128      | 1               | 0.003322259             |
| 18  | 75539208     | 75656108   | 116900      | 1               | 0.003322259             |
| 19  | 3804701      | 3835177    | 30476       | 1               | 0.003322259             |
| 19  | 43372386     | 43539189   | 166803      | 1               | 0.003322259             |
| 19  | 48063134     | 48282069   | 218935      | 1               | 0.003322259             |

*Continued*

**Supplementary Table SI** *Continued*

| Chr                                                           | Start (hg19) | End (hg19) | Length (bp) | Cases (n = 301) | CNVR frequency in cases |
|---------------------------------------------------------------|--------------|------------|-------------|-----------------|-------------------------|
| 20                                                            | 14781684     | 14823472   | 41 788      | 1               | 0.003322259             |
| 22                                                            | 18738296     | 25914592   | 7 176 296   | 1               | 0.003322259             |
| 22                                                            | 25732697     | 25910879   | 178 182     | 3               | 0.009966777             |
| 22                                                            | 43122720     | 43500212   | 377 492     | 1               | 0.003322259             |
| X                                                             | 2591887      | 2802568    | 210 681     | 1               | 0.003322259             |
| X                                                             | 22958001     | 23020021   | 62 020      | 1               | 0.003322259             |
| X                                                             | 47911871     | 47970727   | 58 856      | 2               | 0.006644518             |
| X                                                             | 99931059     | 120328627  | 20 397 568  | 1               | 0.003322259             |
| (B) Microduplications in cohort of women with spontaneous POF |              |            |             |                 |                         |
| 1                                                             | 35570364     | 35656664   | 86 300      | 1               | 0.003322259             |
| 1                                                             | 59891821     | 61162222   | 1 270 401   | 1               | 0.003322259             |
| 1                                                             | 103908591    | 104012569  | 103 978     | 1               | 0.003322259             |
| 1                                                             | 104103057    | 104357400  | 254 343     | 1               | 0.003322259             |
| 1                                                             | 121171208    | 121289118  | 117 910     | 1               | 0.003322259             |
| 1                                                             | 145020771    | 145640129  | 619 358     | 1               | 0.003322259             |
| 1                                                             | 173697478    | 174010664  | 313 186     | 1               | 0.003322259             |
| 1                                                             | 196794652    | 196882038  | 87 386      | 2               | 0.006644518             |
| 1                                                             | 237083719    | 237586469  | 502 750     | 1               | 0.003322259             |
| 2                                                             | 51572556     | 51729681   | 157 125     | 1               | 0.003322259             |
| 2                                                             | 90010895     | 90240473   | 229 578     | 1               | 0.003322259             |
| 2                                                             | 95444917     | 95977790   | 532 873     | 1               | 0.003322259             |
| 2                                                             | 124069523    | 124251487  | 181 964     | 1               | 0.003322259             |
| 2                                                             | 128368235    | 128405920  | 37 685      | 1               | 0.003322259             |
| 2                                                             | 130982377    | 131096727  | 114 350     | 1               | 0.003322259             |
| 2                                                             | 133584471    | 133902333  | 317 862     | 1               | 0.003322259             |
| 2                                                             | 170051329    | 170213930  | 162 601     | 1               | 0.003322259             |
| 2                                                             | 200250898    | 201845999  | 1 595 101   | 1               | 0.003322259             |
| 2                                                             | 216629374    | 217251859  | 622 485     | 1               | 0.003322259             |
| 3                                                             | 66894        | 2552565    | 2 485 671   | 1               | 0.003322259             |
| 3                                                             | 6224872      | 6598777    | 373 905     | 1               | 0.003322259             |
| 3                                                             | 35832877     | 35925872   | 92 995      | 1               | 0.003322259             |
| 3                                                             | 122964492    | 123080578  | 116 086     | 1               | 0.003322259             |
| 3                                                             | 173239453    | 173289281  | 49 828      | 1               | 0.003322259             |
| 3                                                             | 182896411    | 183198268  | 301 857     | 1               | 0.003322259             |
| 4                                                             | 10188326     | 11112475   | 924 149     | 1               | 0.003322259             |
| 4                                                             | 18303100     | 18412600   | 109 500     | 1               | 0.003322259             |
| 4                                                             | 57759221     | 57795328   | 36 107      | 1               | 0.003322259             |
| 4                                                             | 80179372     | 80566060   | 386 688     | 1               | 0.003322259             |
| 4                                                             | 127037075    | 127760876  | 723 801     | 2               | 0.006644518             |
| 4                                                             | 131965131    | 132354287  | 389 156     | 1               | 0.003322259             |
| 4                                                             | 188498590    | 189313688  | 815 098     | 1               | 0.003322259             |
| 5                                                             | 9529809      | 9990381    | 460 572     | 1               | 0.003322259             |
| 5                                                             | 32107381     | 32159517   | 52 136      | 1               | 0.003322259             |
| 5                                                             | 34003361     | 34663915   | 660 554     | 1               | 0.003322259             |
| 5                                                             | 129648250    | 130330467  | 682 217     | 1               | 0.003322259             |
| 6                                                             | 95354276     | 95676106   | 321 830     | 1               | 0.003322259             |
| 6                                                             | 137941485    | 138002056  | 60 571      | 1               | 0.003322259             |

*Continued*

**Supplementary Table SI** *Continued*

| Chr | Start (hg19) | End (hg19) | Length (bp) | Cases (n = 301) | CNVR frequency in cases |
|-----|--------------|------------|-------------|-----------------|-------------------------|
| 6   | 161362678    | 161469774  | 107 096     | 1               | 0.003322259             |
| 6   | 168352586    | 168597242  | 244 656     | 3               | 0.009966777             |
| 6   | 170713690    | 170890384  | 176 694     | 1               | 0.003322259             |
| 7   | 37445        | 68920      | 31 475      | 1               | 0.003322259             |
| 7   | 132529       | 162448     | 29 919      | 2               | 0.006644518             |
| 7   | 13193276     | 13244473   | 51 197      | 1               | 0.003322259             |
| 7   | 17584021     | 17640215   | 56 194      | 1               | 0.003322259             |
| 7   | 21483605     | 21589243   | 105 638     | 1               | 0.003322259             |
| 7   | 29209361     | 29535998   | 326 637     | 1               | 0.003322259             |
| 7   | 37741319     | 37885121   | 143 802     | 1               | 0.003322259             |
| 7   | 57481104     | 57621951   | 140 847     | 1               | 0.003322259             |
| 7   | 62043624     | 62336389   | 292 765     | 6               | 0.019933555             |
| 7   | 76289033     | 76476970   | 187 937     | 1               | 0.003322259             |
| 7   | 76432653     | 76476970   | 44 317      | 3               | 0.009966777             |
| 7   | 100968363    | 101127455  | 159 092     | 1               | 0.003322259             |
| 7   | 140070378    | 140129626  | 59 248      | 1               | 0.003322259             |
| 8   | 11745820     | 11860259   | 114 439     | 1               | 0.003322259             |
| 8   | 104996667    | 105229526  | 232 859     | 1               | 0.003322259             |
| 8   | 130866512    | 131107094  | 240 582     | 1               | 0.003322259             |
| 9   | 46587        | 262191     | 215 604     | 1               | 0.003322259             |
| 9   | 244457       | 262191     | 17 734      | 2               | 0.006644518             |
| 9   | 4287179      | 5579213    | 1 292 034   | 2               | 0.006644518             |
| 9   | 104819532    | 104883836  | 64 304      | 1               | 0.003322259             |
| 9   | 138149166    | 138237120  | 87 954      | 1               | 0.003322259             |
| 10  | 47013328     | 47703946   | 690 618     | 42              | 0.139534883             |
| 10  | 132547998    | 133057358  | 509 360     | 1               | 0.003322259             |
| 10  | 135252347    | 135378802  | 126 455     | 2               | 0.006644518             |
| 11  | 34642823     | 34796804   | 153 981     | 1               | 0.003322259             |
| 11  | 50023832     | 50682188   | 658 356     | 3               | 0.009966777             |
| 11  | 107554267    | 108004957  | 450 690     | 1               | 0.003322259             |
| 11  | 133433026    | 133716356  | 283 330     | 1               | 0.003322259             |
| 11  | 134369417    | 134714635  | 345 218     | 1               | 0.003322259             |
| 12  | 7895024      | 8014573    | 119 549     | 5               | 0.016611296             |
| 12  | 31157554     | 31391194   | 233 640     | 15              | 0.049833887             |
| 12  | 36702406     | 37120187   | 417 781     | 1               | 0.003322259             |
| 12  | 38416139     | 38653605   | 237 466     | 1               | 0.003322259             |
| 12  | 63946056     | 64116159   | 170 103     | 1               | 0.003322259             |
| 12  | 100307887    | 100452062  | 144 175     | 1               | 0.003322259             |
| 12  | 104908843    | 105074764  | 165 921     | 1               | 0.003322259             |
| 12  | 109547668    | 109661414  | 113 746     | 1               | 0.003322259             |
| 12  | 125260645    | 125321461  | 60 816      | 1               | 0.003322259             |
| 12  | 129806980    | 130480186  | 673 206     | 1               | 0.003322259             |
| 13  | 23368834     | 24815661   | 1 446 827   | 1               | 0.003322259             |
| 13  | 24936847     | 25010174   | 73 327      | 1               | 0.003322259             |
| 13  | 66172692     | 66345298   | 172 606     | 1               | 0.003322259             |
| 13  | 68194708     | 68272196   | 77 488      | 1               | 0.003322259             |
| 13  | 90387808     | 90490883   | 103 075     | 1               | 0.003322259             |

*Continued*

**Supplementary Table SI** *Continued*

| Chr | Start (hg19) | End (hg19) | Length (bp) | Cases (n = 301) | CNVR frequency in cases |
|-----|--------------|------------|-------------|-----------------|-------------------------|
| 13  | 95937149     | 96030662   | 93 513      | 1               | 0.003322259             |
| 13  | 111676920    | 111746149  | 69 229      | 1               | 0.003322259             |
| 14  | 20213937     | 20420338   | 206 401     | 4               | 0.013289037             |
| 14  | 49463484     | 49657524   | 194 040     | 1               | 0.003322259             |
| 14  | 106124720    | 106949307  | 824 587     | 1               | 0.003322259             |
| 15  | 22076598     | 22219100   | 142 502     | 1               | 0.003322259             |
| 15  | 32049125     | 32418038   | 368 913     | 2               | 0.006644518             |
| 15  | 34800595     | 35026251   | 225 656     | 1               | 0.003322259             |
| 15  | 82429837     | 82691453   | 261 616     | 1               | 0.003322259             |
| 15  | 100988564    | 101401627  | 413 063     | 1               | 0.003322259             |
| 15  | 102251993    | 102461162  | 209 169     | 1               | 0.003322259             |
| 16  | 9194963      | 9356311    | 161 348     | 1               | 0.003322259             |
| 16  | 13889247     | 14163635   | 274 388     | 1               | 0.003322259             |
| 16  | 29779861     | 29980031   | 200 170     | 1               | 0.003322259             |
| 16  | 75539436     | 75577559   | 38 123      | 1               | 0.003322259             |
| 17  | 34815551     | 36220373   | 1 404 822   | 1               | 0.003322259             |
| 17  | 44249096     | 44293020   | 43 924      | 1               | 0.003322259             |
| 17  | 77365534     | 77394037   | 28 503      | 1               | 0.003322259             |
| 18  | 9450518      | 9547947    | 97 429      | 1               | 0.003322259             |
| 18  | 14774429     | 15375878   | 601 449     | 1               | 0.003322259             |
| 18  | 65274155     | 65597947   | 323 767     | 2               | 0.006644518             |
| 19  | 20835290     | 20987550   | 152 260     | 2               | 0.006644518             |
| 19  | 34480641     | 34687560   | 206 919     | 1               | 0.003322259             |
| 19  | 48085766     | 48160500   | 74 734      | 1               | 0.003322259             |
| 19  | 52272131     | 52588718   | 316 587     | 1               | 0.003322259             |
| 20  | 23619740     | 23727830   | 108 090     | 1               | 0.003322259             |
| 21  | 19888645     | 25594975   | 5 706 330   | 1               | 0.003322259             |
| 21  | 27502468     | 27849346   | 346 878     | 1               | 0.003322259             |
| 22  | 18892575     | 19026403   | 133 828     | 2               | 0.006644518             |
| 22  | 20220764     | 21024880   | 804 116     | 3               | 0.009966777             |
| 22  | 22312879     | 22556358   | 243 479     | 2               | 0.006644518             |
| 22  | 25661725     | 25910879   | 249 154     | 4               | 0.013289037             |
| 22  | 37485062     | 37618530   | 133 468     | 1               | 0.003322259             |
| X   | 6497085      | 6596639    | 99 554      | 3               | 0.009966777             |
| X   | 6516735      | 8135053    | 1 618 318   | 2               | 0.006644518             |
| X   | 22818110     | 22862852   | 44 742      | 1               | 0.003322259             |
| X   | 31453403     | 31560484   | 107 081     | 1               | 0.003322259             |
| X   | 38490844     | 38624791   | 133 947     | 1               | 0.003322259             |
| X   | 66905875     | 67475065   | 569 190     | 1               | 0.003322259             |
| X   | 134292131    | 134852104  | 559 973     | 1               | 0.003322259             |
