# Supplementary material for: Copy number variation analysis detects novel candidate genes involved in follicular growth and oocyte maturation in a cohort of premature ovarian failure cases
Source: PubMed Central journal article supplement — Hum Reprod. 2016 Aug 4;31(8):1913–25. doi: 10.1093/humrep/dew142 (PMC4974666; doi:10.1093/humrep/dew142), 2016-08-04
Supplement: supp_dew142_dew142supp_table2.pdf [file supp_dew142_dew142supp_table2.pdf]

**Supplementary Table SII Rare copy number changes identified in women with spontaneous premature ovarian failure (POF).**

| Chr                                                             | Start (hg19) | End (hg19) | Length (bp) | Genes within CNVR                                                                                                     | CNVRs among cases (n = 301) | CNVRs among controls (n = 3188) |
|-----------------------------------------------------------------|--------------|------------|-------------|-----------------------------------------------------------------------------------------------------------------------|-----------------------------|---------------------------------|
| (A) Microdeletions in a cohort of women with spontaneous POF    |              |            |             |                                                                                                                       |                             |                                 |
| 1                                                               | 49100192     | 50081573   | 981 381     | AGBL4, BEND5                                                                                                          | 1                           | 0                               |
| 1                                                               | 62212822     | 62422442   | 209 620     | INADL                                                                                                                 | 1                           | 0                               |
| 1                                                               | 240371821    | 240561727  | 189 906     | FMN2                                                                                                                  | 1                           | 1                               |
| 2                                                               | 73828493     | 73900329   | 71 836      | ALMS1, NAT8                                                                                                           | 1                           | 0                               |
| 4                                                               | 177006043    | 177109326  | 103 283     | WDR17, SPATA4                                                                                                         | 1                           | 0                               |
| 6                                                               | 73697858     | 73935015   | 237 157     | KCNQ5, KHDC1L                                                                                                         | 1                           | 0                               |
| 7                                                               | 2302956      | 2377332    | 74 376      | SNX8                                                                                                                  | 1                           | 0                               |
| 7                                                               | 33639870     | 33730376   | 90 506      | BBS9                                                                                                                  | 1                           | 8                               |
| 8                                                               | 8131816      | 12249050   | 4 117 234   | SGK223...FAM66A                                                                                                       | 1                           | 0                               |
| 8                                                               | 113618413    | 113719181  | 100 768     | CSMD3                                                                                                                 | 1                           | 0                               |
| 9                                                               | 95063947     | 95179836   | 115 889     | NOL8, CENPP, OGN, OMD                                                                                                 | 1                           | 1                               |
| 9                                                               | 114337013    | 114387135  | 50 122      | ZNF483, PTGR1                                                                                                         | 1                           | 0                               |
| 9                                                               | 119285144    | 119803933  | 518 789     | ASTN2, TRIM32                                                                                                         | 1                           | 0                               |
| 10                                                              | 135256762    | 135379710  | 122 948     | CYP2E1, SYCE1                                                                                                         | 2                           |                                 |
| 15                                                              | 57667027     | 57734290   | 67 263      | CGNLI                                                                                                                 | 1                           | 0                               |
| 15                                                              | 83213963     | 84811815   | 1 597 852   | CPEB1, AP3B2, FSD2, WHAMM, HOMER2, FAM103A1, C15orf40, BTBD1, TM6SF1, HDGFRP3, BNCL1, SH3GL3, ADAMTSL3, EFTUD1P1      | 1                           | 0                               |
| 17                                                              | 11885        | 114669     | 102 784     | DOC2B, RPH3AL                                                                                                         | 1                           | 1                               |
| 17                                                              | 14105874     | 15383769   | 1 277 895   | COX10, CDRT15, HS3ST3B1, PMP22, TEK3, CDRT4                                                                           | 1                           | 1                               |
| 19                                                              | 3804701      | 3835177    | 30 476      | ZFR2                                                                                                                  | 1                           | 0                               |
| 19                                                              | 48063134     | 48282069   | 218 935     | GLTSCR1, EHD2                                                                                                         | 1                           | 0                               |
| 22                                                              | 43122720     | 43500212   | 377 492     | ARFGAP3, PACSIN2, TLL1                                                                                                | 1                           |                                 |
| X                                                               | 2591887      | 2802568    | 210 681     | CD99, XG, GYG2                                                                                                        | 1                           | 0                               |
| X                                                               | 99931059     | 120328627  | 2 0397 568  | SYTL4...GLUD2                                                                                                         | 1                           | 0                               |
| (B) Microduplications in a cohort of women with spontaneous POF |              |            |             |                                                                                                                       |                             |                                 |
| 1                                                               | 35570364     | 35656664   | 86 300      | ZMYM1, SFPQ                                                                                                           | 1                           | 0                               |
| 1                                                               | 59891821     | 61162222   | 1 270 401   | FGGY, HOOK1, CYP2J2, C1orf87, PGBD4P8                                                                                 | 1                           | 0                               |
| 1                                                               | 173697478    | 174010664  | 313 186     | KLHL20, CENPL, DARS2                                                                                                  | 1                           | 8                               |
| 1                                                               | 237083719    | 237586469  | 502 750     | RC3H1                                                                                                                 | 1                           | 0                               |
| 2                                                               | 95444917     | 95977790   | 532 873     | ANKRD20A8P, TEK4, MAL, MRPS5, ZNF514, ZNF2, PROM2, KCNIP3                                                             | 1                           | 0                               |
| 2                                                               | 133584471    | 133902333  | 317 862     | NCKAP5                                                                                                                | 1                           | 1                               |
| 2                                                               | 200250898    | 201845999  | 1 595 101   | SATB2, FTCDNLI, C2orf69, TYW5, C2orf47, SPATS2L, KCTD18, SGOL2, AOX1, AOX2P, BZWI, CLK1, PPIL3, NIF3LI, ORC2, FAM126B | 1                           | 1                               |
| 2                                                               | 216629374    | 217251859  | 622 485     | MREG, PECR, TMEM169, XRCC5, PKI55, MARCH4                                                                             | 1                           | 0                               |
| 3                                                               | 66894        | 2552565    | 2 485 671   | CHL1, CNTN6, CNTN4                                                                                                    | 1                           | 10                              |
| 3                                                               | 122964492    | 123080578  | 116 086     | SEC22A, ADCY5                                                                                                         | 1                           | 0                               |
| 3                                                               | 182896411    | 183198268  | 301 857     | MCF2L2, B3GNT5                                                                                                        | 1                           | 0                               |
| 4                                                               | 10188326     | 11112475   | 924 149     | ZNF518B, CLNK                                                                                                         | 1                           | 0                               |
| 4                                                               | 57759221     | 57795328   | 36 107      | REST                                                                                                                  | 1                           | 0                               |
| 4                                                               | 80179372     | 80566060   | 386 688     | NAA11, GK2                                                                                                            | 1                           | 7                               |
| 5                                                               | 9529809      | 9990381    | 460 572     | SEMASA, TAS2R1                                                                                                        | 1                           | 0                               |
| 5                                                               | 34003361     | 34663915   | 660 554     | AMACR, C1QTNF3, RAI14                                                                                                 | 1                           | 1                               |

Continued

**Supplementary Table SII** *Continued*

| <b>Chr</b> | <b>Start (hg19)</b> | <b>End (hg19)</b> | <b>Length (bp)</b> | <b>Genes within CNVR</b>                                                                                           | <b>CNVRs among cases (n = 301)</b> | <b>CNVRs among controls (n = 3188)</b> |
|------------|---------------------|-------------------|--------------------|--------------------------------------------------------------------------------------------------------------------|------------------------------------|----------------------------------------|
| 6          | 170713690           | 170890384         | 176 694            | <i>FAM120B, PSMB1, TBP, PDCD2</i>                                                                                  | 1                                  | 1                                      |
| 7          | 21483605            | 21589243          | 105 638            | <i>SP4, DNAH11</i>                                                                                                 | 1                                  | 0                                      |
| 7          | 37741319            | 37885121          | 143 802            | <i>GPR141</i>                                                                                                      | 1                                  | 0                                      |
| 7          | 140070378           | 140129626         | 59 248             | <i>SLC37A3, RAB19</i>                                                                                              | 1                                  | 2                                      |
| 8          | 104996667           | 105229526         | 232 859            | <i>RIMS2</i>                                                                                                       | 1                                  | 0                                      |
| 12         | 104908843           | 105074764         | 165 921            | <i>CHST11</i>                                                                                                      | 1                                  | 0                                      |
| 12         | 125260645           | 125321461         | 60 816             | <i>SCARB1</i>                                                                                                      | 1                                  | 1                                      |
| 15         | 82429837            | 82691453          | 261 616            | <i>EFTUD1, FAM154B, GOLGA6L10</i>                                                                                  | 1                                  | 0                                      |
| 16         | 13889247            | 14163635          | 274 388            | <i>ERCC4</i>                                                                                                       | 1                                  | 0                                      |
| 16         | 29779861            | 29980031          | 200 170            | <i>ZG16, KIF22, MAZ, PRRT2, PAGRI, MVP, CDIPT, SEZ6L2, ASPHD1, KCTD13, TMEM219</i>                                 | 1                                  | 1                                      |
| 17         | 34815551            | 36220373          | 1 404 822          | <i>ZNHIT3, MYO19, PIGW, GGNBP2, DHRS11, MRM1, LHX1, AATF, ACACA, C17orf78, TADA2A, DUSP14, SYNRG, DDX52, HNF1B</i> | 1                                  | 8                                      |
| 18         | 9450518             | 9547947           | 97 429             | <i>RALBP1, PPP4R1</i>                                                                                              | 1                                  | 0                                      |
| 21         | 27502468            | 27849346          | 346 878            | <i>APP, CYR1</i>                                                                                                   | 1                                  | 0                                      |
| 22         | 37485062            | 37618530          | 133 468            | <i>TMPRSS6, IL2RB, C1QTNF6, SSTR3</i>                                                                              | 1                                  | 0                                      |
| X          | 6516735             | 8135053           | 1 618 318          | <i>HDHD1, STS, VCX, PNPLA4</i>                                                                                     | 2                                  | 21                                     |
| X          | 66905875            | 67475065          | 569 190            | <i>AR, OPHN1</i>                                                                                                   | 1                                  | 1                                      |

CNVR, copy number variation region.
