# Supplementary material for: Copy number variation analysis detects novel candidate genes involved in follicular growth and oocyte maturation in a cohort of premature ovarian failure cases
Source: PubMed Central journal article supplement — Hum Reprod. 2016 Aug 4;31(8):1913–25. doi: 10.1093/humrep/dew142 (PMC4974666; doi:10.1093/humrep/dew142), 2016-08-04
Supplement: supp_dew142_dew142supp_table3.pdf [file supp_dew142_dew142supp_table3.pdf]

**Supplementary Table SIII Exonic and splice site variants identified by whole-exome sequencing within the premature ovarian failure (POF) associated deletion regions.**

| Case ID | Gene     | RefSeq         | Chr | Position (hg19) | rsID        | Zygoty  | cDNA         | Protein      | Allele frequency in ExAC (%) <sup>a</sup> | Effect of mutation | Exclusion criteria                                 |
|---------|----------|----------------|-----|-----------------|-------------|---------|--------------|--------------|-------------------------------------------|--------------------|----------------------------------------------------|
| Case1   | FMN2     | NM_020066.4    | 1   | 240370629       | rs10926166  | hom_alt | c.2517C>G    | p.(-)        | 0.3923                                    | Synonymous         | NA                                                 |
| Case1   | FMN2     | NM_020066.4    | 1   | 240371106       | rs11586155  | het     | c.2994C>T    | p.(-)        | 0.3577                                    | Synonymous         | Likely a sequencing error                          |
| Case1   | FMN2     | NM_020066.4    | 1   | 240371211       | rs201587786 | hom_alt | c.3099G>T    | p.(-)        | NA                                        | Synonymous         | NA                                                 |
| Case1   | FMN2     | NM_020066.4    | 1   | 240371554       | rs12732924  | hom_alt | c.3442A>G    | p.(-)        | 0.9111                                    | Missense           | NA                                                 |
| Case7   | CYP2E1   | NM_000773.3    | 10  | 135347397       | rs915909    | hom_alt | c.963T>C     | p.(-)        | 0.9999                                    | Synonymous         | NA                                                 |
| Case8   | CYP2E1   | NM_000773.3    | 10  | 135347397       | rs915909    | hom_alt | c.963T>C     | p.(-)        | 0.9999                                    | Synonymous         | NA                                                 |
| Case8   | CYP2E1   | NM_000773.3    | 10  | 135351362       | rs2515641   | hom_alt | c.1263T>C    | p.(-)        | 0.8869                                    | Synonymous         | NA                                                 |
| Case10  | CPEB1    | NM_001079533.1 | 15  | 83224696        | rs1145171   | hom_alt | c.331G>A     | p.Val111Ile  | 1                                         | Missense           | NA                                                 |
| Case10  | AP3B2    | NM_004644.4    | 15  | 83330605        | rs376398184 | hom_alt | c.2931G>A    | p.Met977Ile  | 0.0001117                                 | Missense           | NA                                                 |
| Case10  | AP3B2    | NM_004644.4    | 15  | 83346018        | rs3217364   | het     | c.1488+7delG | p.(-)        | 0.007189                                  | Splice site        | Homozygous genotype validated by Sanger sequencing |
| Case10  | FSD2     | NM_001007122.3 | 15  | 83428193        | rs1108135   | hom_alt | c.2157C>T    | p.(-)        | 0.1091                                    | Synonymous         | NA                                                 |
| Case10  | WHAMM    | NM_001080435.2 | 15  | 83502065        | rs11259953  | hom_alt | c.2207A>C    | p.His736Pro  | 0.102                                     | Missense           | NA                                                 |
| Case10  | WHAMM    | NM_001080435.2 | 15  | 83502066        | rs11259954  | hom_alt | c.2208C>G    | p.His736Gln  | 0.102                                     | Missense           | NA                                                 |
| Case10  | C15orf40 | NM_001160116.1 | 15  | 83680287        | rs4842860   | hom_alt | c.73T>C      | p.Cys25Arg   | 0.6396                                    | Missense           | NA                                                 |
| Case10  | ADAMTSL3 | NM_207517.2    | 15  | 84488636        | rs4483821   | hom_alt | c.437A>G     | p.His146Arg  | 0.4528                                    | Missense           | NA                                                 |
| Case10  | ADAMTSL3 | NM_207517.2    | 15  | 84539619        | rs4144691   | hom_alt | c.868C>G     | p.Leu290Val  | 0.8036                                    | Missense           | NA                                                 |
| Case10  | ADAMTSL3 | NM_207517.2    | 15  | 84581904        | rs4842923   | hom_alt | c.1761T>C    | p.(-)        | 0.522                                     | Synonymous         | NA                                                 |
| Case10  | ADAMTSL3 | NM_207517.2    | 15  | 84582124        | rs4842838   | hom_alt | c.1981G>T    | p.Val661Leu  | 0.5218                                    | Missense           | NA                                                 |
| Case10  | ADAMTSL3 | NM_207517.2    | 15  | 84651185        | rs8031704   | hom_alt | c.2805C>A    | p.(-)        | 0.3301                                    | Synonymous         | NA                                                 |
| Case10  | ADAMTSL3 | NM_207517.2    | 15  | 84651290        | rs7176737   | hom_alt | c.2910T>C    | p.(-)        | 0.776                                     | Synonymous         | NA                                                 |
| Case10  | ADAMTSL3 | NM_207517.2    | 15  | 84706461        | rs950169    | hom_alt | c.4979C>T    | p.Thr1660Ile | 0.2763                                    | Missense           | NA                                                 |
| Case13  | TTLL1    | NM_012263.4    | 22  | 43455531        | rs1132079   | hom_alt | c.750G>A     | p.(-)        | 0.308                                     | Splice site        | NA                                                 |
| Case13  | TTLL1    | NM_012263.4    | 22  | 43459846        | rs1052160   | hom_alt | c.720C>T     | p.(-)        | 0.2977                                    | Synonymous         | NA                                                 |

NA, not available; het, heterozygous; hom\_alt, homozygous variant for alternative allele

<sup>a</sup>The allele frequency of variants present in the ExAC dataset are shown in Europeans (Non-Finnish).
