# Supplementary material for: Copy number variation analysis detects novel candidate genes involved in follicular growth and oocyte maturation in a cohort of premature ovarian failure cases
Source: PubMed Central journal article supplement — Hum Reprod. 2016 Aug 4;31(8):1913–25. doi: 10.1093/humrep/dew142 (PMC4974666; doi:10.1093/humrep/dew142), 2016-08-04
Supplement: supp_dew142_dew142supp_table4.pdf [file supp_dew142_dew142supp_table4.pdf]

**Supplementary Table SIV Summary of identified genes that may contribute to the onset of premature menopause.**

| Gene ID        | Gene locus | Protein function                                                                                                                              | Possible connection to premature menopause phenotype                                                                                                                                                       | Association with other phenotypes | References                                                   |
|----------------|------------|-----------------------------------------------------------------------------------------------------------------------------------------------|------------------------------------------------------------------------------------------------------------------------------------------------------------------------------------------------------------|-----------------------------------|--------------------------------------------------------------|
| <i>FMN2</i>    | 1q43       | Involved in cytoskeletal organization and the establishment of cell polarity.                                                                 | KO mice have decreased fertility and abnormal metaphase spindle position and the first polar body formation during Meiosis I.                                                                              | –                                 | Leader <i>et al.</i> (2011)                                  |
| <i>ALMS1</i>   | 2p13.11    | Involved in microtubule organization                                                                                                          | <i>ALMS1</i> is widely expressed in reproductive tissues.                                                                                                                                                  | Alström syndrome                  | Marshall <i>et al.</i> (2007)                                |
| <i>SGOL2</i>   | 2q33.1     | Protects centromeric cohesion from premature separase-mediated cleavage in oocytes specifically during Meiosis I.                             | KO mice are infertile.                                                                                                                                                                                     | –                                 | Llano <i>et al.</i> (2008)                                   |
| <i>PSMB1</i>   | 6q27       | Cleavage of peptide bonds with very broad specificity.                                                                                        | Dysregulation of proteasome subunit $\beta 1$ expression is associated with primary Sjörger's syndrome that can affect female fertility.                                                                   | Primary Sjörger's syndrome        | Martinez-Gamboa <i>et al.</i> (2013)                         |
| <i>TBP</i>     | 6q27       | The core component of promoter recognition factor—TFIID.                                                                                      | Proper TBP levels in the oocytes and zygotes are necessary for the normal development.                                                                                                                     | –                                 | –                                                            |
| <i>BBS9</i>    | 7p14.3     | Involved in parathyroid hormone action in bones.                                                                                              | Association of the gene has been reported previously in POF patients.                                                                                                                                      | Bardet-Biedl Syndrome 9           | Nishimura <i>et al.</i> (2005) and Kang <i>et al.</i> (2008) |
| <i>OGN</i>     | 9q22.31    | Induces ectopic bone formation in conjunction with transforming growth factor beta.                                                           | Expressed in numerous tissues, including ovary, endometrium and pituitary gland, dysfunction of which, may lead to disorders of reproductive system.                                                       | –                                 | –                                                            |
| <i>CENPP</i>   | 9q22.31    | Essential for proper kinetochore function and mitotic progression.                                                                            | Impaired mitotic division during gametogenesis can reduce the starting follicle pool.                                                                                                                      | –                                 | –                                                            |
| <i>SYCE1</i>   | 10q26.3    | Major component of the transverse central element of synaptonemal complexes (SCS), formed between homologous chromosomes in meiotic prophase. | Impaired repair of meiotic double-strand breaks may induce germ-cell loss. Gene has been previously associated with POF.                                                                                   | –                                 | McGuire <i>et al.</i> (2011)                                 |
| <i>SCARB1</i>  | 12q24.31   | Plasma membrane receptor for high density lipoprotein cholesterol (HDL) that mediates cholesterol transfer to and from HDL.                   | KO mice have abnormal HDLs, ovulated dysfunctional oocytes, and are infertile. Over-production might lead to abnormal lipoprotein metabolism that can contribute to some form of human female infertility. | –                                 | Miettinen <i>et al.</i> (2001)                               |
| <i>CPEB1</i>   | 15q25.2    | Involved in cell proliferation and tumorigenesis.                                                                                             | KO mice have vestigial ovaries devoid of oocytes.                                                                                                                                                          | –                                 | McGuire <i>et al.</i> (2011)                                 |
| <i>BNC1</i>    | 15q25.2    | Involved in germ-cell differentiation.                                                                                                        | In knock-out mice the oocyte morphology is affected, which leads to female subfertility.                                                                                                                   | –                                 | Ma <i>et al.</i> (2006)                                      |
| <i>ERCC4</i>   | 16p13.12   | Involved in homologous recombination that assists in removing interstrand cross-link.                                                         | Expressed in many tissues, including female reproductive tract.                                                                                                                                            | –                                 | –                                                            |
| <i>LHX1</i>    | 17q12      | Transcription factor important for the development of the renal and urogenital systems.                                                       | Deletion and gene mutations cause Müllerian agenesis. Overexpression may lead to endometrial hyperplasia with high levels of estrogen, potentially affecting oocyte production or follicle maturation.     | Müllerian agenesis                | Ledig <i>et al.</i> (2010b)                                  |
| <i>ARFGAP3</i> | 22q13.2    | Small G-protein that regulates a wide variety of processes in the cell.                                                                       | Androgen-target gene; expressed in endocrine gland, including ovary (although six-times higher in testis). In bovines may contribute to follicular growth, ovulation, and/or luteinization.                | –                                 | Ndiaye <i>et al.</i> (2005)                                  |

Continued

**Supplementary Table SIV** *Continued*

| <b>Gene ID</b> | <b>Gene locus</b> | <b>Protein function</b>                                                               | <b>Possible connection to premature menopause phenotype</b>                                                                                               | <b>Association with other phenotypes</b> | <b>References</b>            |
|----------------|-------------------|---------------------------------------------------------------------------------------|-----------------------------------------------------------------------------------------------------------------------------------------------------------|------------------------------------------|------------------------------|
| STS            | Xp22.31           | Catalyzes the conversion of sulfated steroid precursors to estrogen during pregnancy. | Overexpression of the gene may lead to abnormal levels of estrogen with potentially deleterious effect on LH and FSH production thus contributing to POF. | –                                        | Quilter <i>et al.</i> (2010) |
| AR             | Xq12              | A steroid hormone receptor, suggested to be involved in folliculogenesis in females.  | KO mice display a POF-like phenotype; altered CAG repeats in the AR gene have been reported in POF patients.                                              | Androgen insensitivity; PCOS             | Azziz <i>et al.</i> (2009)   |

KO, knock-out; PCOS, polycystic ovary syndrome; POF, premature ovarian failure.
